# Supplementary material
Source: publisher figshare collection journal article supplement (https://sage.figshare.com/ndownloader/files/28259262)
Supplement: Supplementary file 1 [file 28259262]

## Section 1: Personal Information

1. Name:

2. Current Job/Designation:

3. Current employer:

4. What was your position at the time you were enrolled in the MA TESOL? Please indicate your **job title** and **employer**.

5. Are you in the same job now?

☐ Yes

☐ No

---

Next

## Section 2: Evaluating the MA TESOL Program

1. To what extent do you agree with the following statements?

1 - Strongly disagree

2 - Disagree

3 - Neutral

4 - Agree

5 - Strongly agree

Please click in the boxes to indicate your response.

a. The MA TESOL has given me more promotional opportunities.

|   |   |   |   |   |
|---|---|---|---|---|
| 1 | 2 | 3 | 4 | 5 |
|---|---|---|---|---|

b. My income/salary has increased as a result of completing the MA TESOL.

|   |   |   |   |   |
|---|---|---|---|---|
| 1 | 2 | 3 | 4 | 5 |
|---|---|---|---|---|

c. Doing the MA TESOL has given me more employment options.

|   |   |   |   |   |
|---|---|---|---|---|
| 1 | 2 | 3 | 4 | 5 |
|---|---|---|---|---|

d. The MA TESOL has given me the skills to do my current job more effectively

|   |   |   |   |   |
|---|---|---|---|---|
| 1 | 2 | 3 | 4 | 5 |
|---|---|---|---|---|

e. I have changed the way I teach as a result of the MA TESOL.

|   |   |   |   |   |
|---|---|---|---|---|
| 1 | 2 | 3 | 4 | 5 |
|---|---|---|---|---|

f. I can apply the content of the MA TESOL in my teaching.

|   |   |   |   |   |
|---|---|---|---|---|
| 1 | 2 | 3 | 4 | 5 |
|---|---|---|---|---|

g. I have a deeper understanding of second language acquisition through completing the MA TESOL.

|   |   |   |   |   |
|---|---|---|---|---|
| 1 | 2 | 3 | 4 | 5 |
|---|---|---|---|---|

h. The MA TESOL has changed my ideas about the best way to teach language skills.

|   |   |   |   |   |
|---|---|---|---|---|
| 1 | 2 | 3 | 4 | 5 |
|---|---|---|---|---|

i. I am now more aware of why I teach the way I do.

|   |   |   |   |   |
|---|---|---|---|---|
| 1 | 2 | 3 | 4 | 5 |
|---|---|---|---|---|

j. Doing the MA TESOL has given me more confidence in doing my job.

|   |   |   |   |   |
|---|---|---|---|---|
| 1 | 2 | 3 | 4 | 5 |
|---|---|---|---|---|

k. I am more respected by colleagues because I completed the MA TESOL.

|   |   |   |   |   |
|---|---|---|---|---|
| 1 | 2 | 3 | 4 | 5 |
|---|---|---|---|---|

l. The MA TESOL has strengthened my professional identity as a teacher.

|   |   |   |   |   |
|---|---|---|---|---|
| 1 | 2 | 3 | 4 | 5 |
|---|---|---|---|---|

---

Next

## Section 3: Your English Language Development during the MA TESOL Course

1. What impact has your participation in the program had on your English language proficiency? Please click the boxes to indicate your response.

Global proficiency

- ☐ No impact
- ☐ Limited impact
- ☐ Moderate impact
- ☐ Large impact

Listening

- ☐ No impact
- ☐ Limited impact
- ☐ Moderate impact
- ☐ Large impact

Speaking

- ☐ No impact
- ☐ Limited impact
- ☐ Moderate impact
- ☐ Large impact

Reading

- ☐ No impact
- ☐ Limited impact
- ☐ Moderate impact
- ☐ Large impact

Writing

- ☐ No impact
- ☐ Limited impact
- ☐ Moderate impact
- ☐ Large impact

Vocabulary

- ☐ No impact
- ☐ Limited impact
- ☐ Moderate impact
- ☐ Large impact

Overall confidence in using English

- ☐ No impact
  - ☐ Limited impact
  - ☐ Moderate impact
  - ☐ Large impact
- 

Next

## Section 4: Overall Benefits

1. Do you feel that doing the MA TESOL has benefitted you?

- ☐ No (Please click 'Next')
  - ☐ Yes (Please specify some benefits)
- 

Next

## Section 5: Suggested Improvements

1. List up to three improvements you think could have been made to the delivery of the program (if any)

Improvements by [REDACTED]

Improvement 1

Improvement 2

Improvement 3

Improvements by [REDACTED]

Improvement 1

Improvement 2

Improvement 3

---

Next

### **FOLLOW UP INTERVIEWS**

Would you be willing to participate in follow-up interviews?

- ☐ Yes  
☐ No

If "yes", do you consent for the interviews to be recorded?

- ☐ Yes  
☐ No  
☐ N.A.

---

Next

Thank you for completing the questionnaire.

Please click "Next" to ensure your responses are recorded.

---

Next
